# Supplementary material
Source: PubMed Central journal article supplement (PMC4002221)
Supplement: cmi201247x1.pdf [file cmi201247x1.pdf]

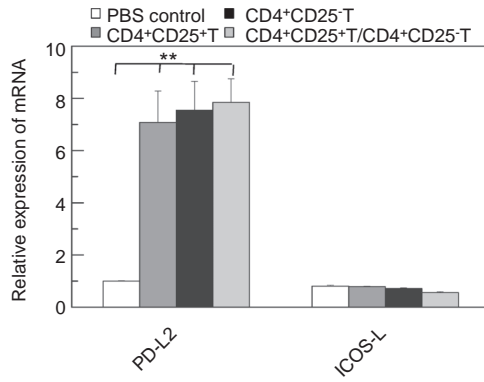

**Supplemental Figure 1** PD-L2 and ICOS-L expression of peritoneal exudate macrophages isolated from NOD-*scid* mice with transfer of allogeneic donor CD4<sup>+</sup>CD25<sup>+</sup> Tregs or CD4<sup>+</sup>CD25<sup>-</sup> T cells or both cells. The relative mRNA expression of PD-L2 and ICOS-L in peritoneal macrophages of recipient NOD-*scid* mice were analyzed by real-time PCR method. More than five mice in each group were assayed. Data were shown as mean  $\pm$  s.d. \*\* $P < 0.01$  among the indicated groups. ICOS, inducible costimulator; PBS, Phosphate Buffered Saline; PD-L2, programmed cell death-ligand 2; Treg, regulatory T cell.

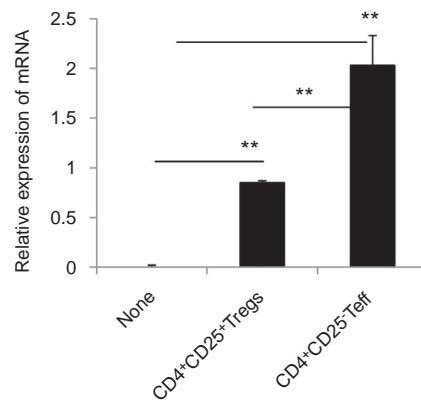

**Supplemental Figure 2** IL-23 expression of peritoneal exudate macrophages isolated from NOD-*scid* mice with transfer of allogeneic donor CD4<sup>+</sup>CD25<sup>+</sup> Tregs or CD4<sup>+</sup>CD25<sup>-</sup> T. The relative mRNA expression of IL-23 in peritoneal macrophages of recipient NOD-*scid* mice were analyzed by real-time PCR method. More than three mice in each group were assayed. Data were shown as mean ± s.d. \*\* $P < 0.01$  among the indicated groups. Teff, T effector cell; Treg, regulatory T cell.
